# Supplementary material for: Human colorectal cancer-on-chip model to study the microenvironmental influence on early metastatic spread
Source: PubMed Central journal article supplement — iScience. 2021 May 2;24(5):102509. doi: 10.1016/j.isci.2021.102509 (PMC8169959; doi:10.1016/j.isci.2021.102509), 2021-05-02
Supplement: mmc1.pdf [file mmc1.pdf]

**iScience, Volume 24**

**Supplemental information**

**Human colorectal cancer-on-chip model  
to study the microenvironmental influence  
on early metastatic spread**

**Carly Strelez, Sujatha Chilakala, Kimya Ghaffarian, Roy Lau, Erin Spiller, Nolan Ung, Danielle Hixon, Ah Young Yoon, Ren X. Sun, Heinz-Josef Lenz, Jonathan E. Katz, and Shannon M. Mumenthaler**

**Table S2. Differential metabolites between D0 and D6 of endothelial channel effluent for the HCT116-CRC-on-Chip, Related to Figure 2.**

| Database source/Library | Metabolite Presumptive ID                 | Observed Molecular Weight | Fold Change | p value  |
|-------------------------|-------------------------------------------|---------------------------|-------------|----------|
| IROA                    | 5-Phospho-D-Ribose 1-Diphosphate          | 435.9554                  | 5.07        | 2.58E-02 |
| IROA                    | 3-(4-Hydroxyphenyl)Lactate                | 182.0583                  | 3.33        | 2.84E-02 |
| IROA                    | Alpha-Ketoglutaric Acid                   | 146.0216                  | 3.21        | 2.79E-02 |
| IROA                    | Citramalate                               | 148.0374                  | 2.68        | 9.39E-06 |
| IROA                    | O-Acetyl-I-Serine                         | 193.0535                  | 2.98        | 2.73E-02 |
| IROA                    | Itaconate                                 | 130.0264                  | 2.94        | 2.57E-02 |
| IROA                    | Tryptophan                                | 204.0874                  | 2.58        | 1.73E-02 |
| IROA                    | Pyruvate                                  | 88.0158                   | -3.26       | 3.89E-03 |
| IROA                    | Homocystine                               | 314.0578                  | -3.26       | 4.58E-05 |
| IROA                    | 1-Hydroxy-2-Naphthoate                    | 188.0476                  | -2.28       | 1.54E-02 |
| IROA                    | Methyl Acetoacetate                       | 116.0468                  | -4.39       | 1.13E-02 |
| IROA                    | 3-(2-Hydroxyphenyl)Propanoate             | 212.0648                  | -3.49       | 2.97E-02 |
| IROA                    | Normetanephrine                           | 243.1021                  | -3.54       | 1.23E-02 |
| IROA                    | Dehydroascorbate                          | 174.0173                  | -3.63       | 2.77E-02 |
| IROA                    | Malate                                    | 133.0377                  | -2.16       | 3.81E-02 |
| IROA                    | 2,6-Dihydroxypyridine                     | 155.9546                  | -2.52       | 3.35E-05 |
| IROA                    | Lactate                                   | 90.0309                   | 2.01        | 3.08E-02 |
| IROA                    | Proline                                   | 115.0634                  | -2.01       | 1.21E-02 |
| IROA                    | N-Acetyl-dl-Glutamic Acid                 | 189.1651                  | -2.63       | 3.67E-02 |
| IROA                    | N-Acetyl-I-Aspartic Acid                  | 175.1396                  | -4.62       | 2.87E-02 |
| IROA                    | Inosine                                   | 268.0808                  | 2.39        | 1.27E-02 |
| IROA                    | Ferulate                                  | 194.1806                  | -9,680      | 3.50E-03 |
| IROA                    | Butanal                                   | 132.0769                  | -2.19       | 3.52E-02 |
| IROA                    | Sarcosine                                 | 89.0477                   | -2.06       | 4.66E-03 |
| IROA                    | Uridine-5-Monophosphate                   | 324.1821                  | -31         | 2.20E-03 |
| METLIN                  | (+)-Chebulic acid                         | 402.0418                  | -2.67       | 4.77E-02 |
| METLIN                  | 2,7-Anhydro-alpha-N-acetylneuraminic acid | 291.0952                  | -3.45       | 1.76E-03 |
| METLIN                  | 2-Aminoadenosine                          | 282.1084                  | -2.85       | 8.90E-04 |
| METLIN                  | 3'-Amino-3'-deoxy-AMP                     | 392.0786                  | -4.61       | 3.98E-02 |
| METLIN                  | 3'-O-Methyl(-)-epicatechin-7-O-sulphate   | 414.0609                  | -3.63       | 2.33E-02 |
| METLIN                  | 5'-Methoxybilobetin                       | 642.1323                  | -2.73       | 1.97E-02 |
| METLIN                  | 8-Hydroxy-3-chlorodibenzofuran            | 218.0109                  | 3.35        | 3.26E-02 |
| METLIN                  | AVE-1625                                  | 556.0857                  | -2.79       | 1.90E-02 |

|                   |                              |          |       |          |
|-------------------|------------------------------|----------|-------|----------|
| Molecular Formula | C19 H42 N2 O22               | 650.2241 | 3.49  | 1.75E-02 |
| Molecular Formula | C22 H21 N3 O21               | 663.0698 | -4.71 | 2.40E-05 |
| Molecular Formula | C24 H21 N6 O22               | 745.0721 | -2.75 | 4.43E-05 |
| Molecular Formula | C26 H21 N9 O23               | 827.0735 | -2.73 | 2.02E-05 |
| Molecular Formula | C28 H29 O15                  | 605.1506 | -2.2  | 4.18E-02 |
| Molecular Formula | C4 H2 N O3 S2                | 175.9456 | 2.39  | 2.34E-02 |
| Molecular Formula | C40 H17 N10 O17              | 909.0706 | -3.64 | 2.46E-04 |
| Molecular Formula | C5 H4 N2                     | 92.0362  | -2.07 | 1.07E-02 |
| METLIN            | Dihydropteroic acid          | 360.1175 | -2.78 | 3.08E-02 |
| METLIN            | Distemonanthin               | 404.0397 | -2.7  | 4.19E-02 |
| METLIN            | fumarylacetic acid           | 158.0212 | 2.82  | 3.71E-02 |
| METLIN            | Galactosylglycerol           | 314.1227 | 2.07  | 8.27E-03 |
| METLIN            | Hydrouracil (Dihydrothymine) | 128.0589 | 2.34  | 4.33E-03 |
| METLIN            | N-Nitrosodiethylamine        | 102.0796 | 2.3   | 7.07E-03 |
| METLIN            | Phosphophosphinate           | 335.0578 | -2.19 | 1.71E-04 |

**Table S3. Differential metabolites between D0 and D6 of epithelial channel effluent for the HT29-CRC-on-Chip, Related to Figure 2.**

| Database source/Library | Metabolite Presumptive ID   | Observed Molecular Weight | Fold Change | p value  |
|-------------------------|-----------------------------|---------------------------|-------------|----------|
| IROA                    | 1-Methyladenosine           | 281.1137                  | -12         | 1.14E-02 |
| IROA                    | 3-Ureidopropionate          | 132.0533                  | -2.91       | 7.45E-08 |
| IROA                    | 5'-Methylthioadenosine      | 314.1091                  | 2.18        | 5.28E-03 |
| IROA                    | Raffinose                   | 564.172                   | 3.52        | 2.24E-03 |
| IROA                    | Aspartate                   | 133.0373                  | 3.31        | 2.96E-03 |
| IROA                    | Ornithine                   | 132.0895                  | -2.43       | 9.24E-07 |
| IROA                    | Flavin Adenine Dinucleotide | 785.1841                  | 2.41        | 1.23E-03 |
| IROA                    | Inosine                     | 268.0791                  | 2.78        | 3.59E-03 |
| IROA                    | L-Proline                   | 115.0629                  | -2.80       | 2.25E-09 |
| IROA                    | N-Acetylneuraminate         | 326.1354                  | 6.45        | 8.41E-04 |
| IROA                    | Pyrrole-2-Carboxylate       | 133.011                   | -3.52       | 2.44E-12 |
| IROA                    | Sarcosine                   | 89.0471                   | -3.31       | 3.72E-10 |
| IROA                    | Sucrose                     | 342.1176                  | -2.60       | 1.03E-03 |
| IROA                    | Xanthine                    | 152.0325                  | -3.80       | 5.62E-06 |
| IROA                    | Citrate                     | 192.0271                  | -2.17       | 2.61E-04 |
| IROA                    | 5-Oxo-l-proline             | 129.0431                  | -2.70       | 1.57E-04 |
| IROA                    | Lactate                     | 90.0312                   | -2.4        | 5.09E-03 |
| IROA                    | Ferulate                    | 194.0573                  | -6.16       | 1.04E-03 |

|                   |                                                                                                                           |           |       |          |
|-------------------|---------------------------------------------------------------------------------------------------------------------------|-----------|-------|----------|
| IROA              | 1-Methyl-6,7-Dihydroxy-1,2,3,4-Tetrahydroisoquinoline                                                                     | 179.0941  | -3.75 | 3.28E-02 |
| IROA              | L-Kynurenine                                                                                                              | 208.084   | -23   | 1.54E-02 |
| IROA              | Cholesteryl Acetate                                                                                                       | 428.365   | 2.28  | 4.50E-02 |
| IROA              | 2-Hydroxybutyric Acid                                                                                                     | 126.0315  | -53   | 9.31E-04 |
| METLIN            | 1,2-Dihydroxynaphthalene-6-sulfonate                                                                                      | 286.0166  | 3.11  | 2.00E-03 |
| METLIN            | 2-(beta-D-Glucosyl)-sn-glycerol                                                                                           | 300.103   | -3.1  | 7.82E-04 |
| METLIN            | 2-C-Methyl-D-erythritol 2,4-cyclodiphosphate                                                                              | 323.9953  | -2.2  | 4.32E-04 |
| METLIN            | 2-Phenylaminoadenosine                                                                                                    | 358.1384  | -4.1  | 3.73E-05 |
| METLIN            | 3-Hydroxy-L-tyrosyl-AMP                                                                                                   | 526.1335  | 2.51  | 1.57E-04 |
| METLIN            | 3-Hydroxy-OPC4-CoA                                                                                                        | 1003.2531 | 2.76  | 7.31E-04 |
| METLIN            | 6''-(4-Carboxy-3-hydroxy-3-methylbutanoyl)hyperin                                                                         | 608.1362  | 2.31  | 1.66E-04 |
| METLIN            | 6-Mercaptopurine ribonucleoside 5'-diphosphate                                                                            | 461.0225  | -3.2  | 3.86E-11 |
| METLIN            | AM679                                                                                                                     | 417.0581  | -3    | 1.54E-09 |
| METLIN            | Azamethiphos                                                                                                              | 345.9607  | 2.16  | 2.50E-02 |
| METLIN            | Butoconazole                                                                                                              | 456.0233  | 3.93  | 5.22E-03 |
| Molecular Formula | C13 H6 N O7                                                                                                               | 288.0157  | 3.01  | 2.41E-03 |
| Molecular Formula | C16 H11 N6 O16                                                                                                            | 543.0254  | -3.4  | 6.42E-11 |
| Molecular Formula | C20 H13 N6 O18                                                                                                            | 625.0279  | -3.2  | 4.80E-11 |
| Molecular Formula | C21 H15 N10 O16                                                                                                           | 663.065   | -3.6  | 2.88E-08 |
| Molecular Formula | C21 H35 N8 O17 S                                                                                                          | 703.1831  | 2.62  | 2.37E-03 |
| Molecular Formula | C22 H17 N6 O20                                                                                                            | 685.0471  | -3.3  | 2.54E-11 |
| Molecular Formula | C25 H15 N11 O18 S                                                                                                         | 789.0297  | -2.6  | 2.82E-10 |
| Molecular Formula | C25 H32 N4 O24                                                                                                            | 772.1405  | 2.05  | 2.04E-04 |
| Molecular Formula | C27 H17 N19 O                                                                                                             | 623.1863  | 2.63  | 9.35E-04 |
| Molecular Formula | C27 H24 N18 O11                                                                                                           | 776.1849  | 3.1   | 1.96E-04 |
| Molecular Formula | C29 H29 N22 O4 S2                                                                                                         | 813.2188  | 2.72  | 1.10E-03 |
| Molecular Formula | C33 H54 N O26 S2                                                                                                          | 944.2348  | 4.5   | 3.85E-04 |
| Molecular Formula | C34 H13 N13 O14                                                                                                           | 827.0675  | -2.6  | 3.79E-08 |
| Molecular Formula | C34 H13 N14 O21                                                                                                           | 953.0244  | -2.3  | 6.97E-09 |
| Molecular Formula | C34 H15 N8 O21                                                                                                            | 871.0308  | -2.4  | 1.82E-09 |
| Molecular Formula | C35 H11 N11 O10                                                                                                           | 745.0668  | -3.4  | 4.98E-08 |
| Molecular Formula | C42 H19 N13                                                                                                               | 705.187   | 2.34  | 9.18E-04 |
| METLIN            | Cyanidin 3-O-[beta-D-Xylopyranosyl-(1-2)-[(4-hydroxybenzoyl)-(-6)-beta-D-glucopyranosyl-(1-6)]]-beta-D-galactopyranoside] | 862.2344  | 4.4   | 2.04E-04 |
| METLIN            | Eujambolin                                                                                                                | 542.1054  | 2.39  | 3.05E-03 |

|        |                                                                  |          |       |          |
|--------|------------------------------------------------------------------|----------|-------|----------|
| METLIN | Floxacin                                                         | 499.0614 | -3.1  | 1.53E-08 |
| METLIN | Flupyr sulfuron-methyl                                           | 465.0653 | -2.1  | 4.78E-09 |
| METLIN | Gossypetin 3-sophoroside-8-glucoside                             | 821.206  | 3.78  | 2.22E-03 |
| METLIN | His Phe Gly                                                      | 381.1381 | 34.1  | 2.05E-03 |
| METLIN | Isoscutellarein 7-(6'''-acetylallosyl-(1-2)-6''-acetylglucoside) | 694.1832 | 3.22  | 2.54E-04 |
| METLIN | Leucodelphinidin 3-[galactosyl-(1-4)-glucoside]                  | 646.1742 | 3.13  | 6.06E-03 |
| METLIN | Leu-Nap-OH                                                       | 482.1693 | 3.59  | 3.80E-03 |
| METLIN | L-Rhamnulose 1-phosphate                                         | 304.0556 | 4.83  | 4.93E-03 |
| METLIN | N-(4-hydroxyphenyl)ethoxycarbothioamide                          | 197.0535 | -2.6  | 2.90E-06 |
| METLIN | N-benzyl-1-methyl-1H-pyrazolo[3,4-d]pyrimidin-4-amine            | 239.117  | -2    | 2.23E-02 |
| METLIN | N-Cyclohexylformamide                                            | 127.1005 | -1100 | 4.94E-07 |
| METLIN | Obtusol                                                          | 472.0021 | 2.6   | 1.78E-03 |
| METLIN | Perfludone                                                       | 379.0197 | -3    | 2.66E-12 |
| METLIN | Phosphophosphinate                                               | 297.0171 | -3.8  | 1.80E-10 |
| METLIN | Photinus luciferin                                               | 325.9949 | -2.3  | 2.47E-04 |
| METLIN | Primflaside                                                      | 728.1765 | 3     | 5.92E-04 |
| METLIN | PtdIns-(4,5)-P2 (1,2-dihexanoyl)                                 | 690.1374 | 2.2   | 1.67E-04 |
| METLIN | Pyridoxamine-5'-Phosphate                                        | 294.0578 | -180  | 1.90E-04 |
| METLIN | Tamarixetin 3-O-sulfate                                          | 396.0145 | 3.51  | 1.85E-03 |
| METLIN | Thioridazine 2,5-disulfoxide                                     | 419.1748 | -2.7  | 3.87E-05 |
| METLIN | UDP-L-Ara4N                                                      | 581.0635 | -3.5  | 7.06E-09 |
| METLIN | PC(O-12:0/2:0)                                                   | 467.3018 | 15    | 4.22E-02 |
| METLIN | L-Arogenate                                                      | 227.0789 | -13   | 4.47E-02 |
| METLIN | PS(P-16:0/15:1(9Z))                                              | 703.4809 | 2.32  | 4.54E-02 |
| METLIN | Glu Tyr                                                          | 310.1154 | -3.22 | 3.88E-02 |

**Table S4. Differential metabolites between D0 and D6 of endothelial channel effluent for the HT29-CRC-on-Chip, Related to Figure 2.**

| Database source/Library | Metabolite Presumptive ID | Observed Molecular Weight | Fold Change | p value  |
|-------------------------|---------------------------|---------------------------|-------------|----------|
| IROA                    | N-Acetylneuraminate       | 326.1354                  | 2.64        | 2.79E-03 |
| IROA                    | Sucrose                   | 342.1176                  | -53         | 2.02E-03 |
| IROA                    | Hypoxanthine              | 136.038                   | 3.62        | 1.60E-03 |
| IROA                    | 2-Hydroxybutyric Acid     | 126.0315                  | -2.31       | 2.44E-02 |
| IROA                    | Inosine                   | 268.0791                  | 2.26        | 2.00E-03 |

|                   |                                                       |          |       |          |
|-------------------|-------------------------------------------------------|----------|-------|----------|
| METLIN            | His Phe Gly                                           | 381.1381 | 2.15  | 3.74E-03 |
| METLIN            | N-benzyl-1-methyl-1H-pyrazolo[3,4-d]pyrimidin-4-amine | 239.117  | -4.1  | 1.06E-04 |
| METLIN            | N-Cyclohexylformamide                                 | 127.1005 | -14   | 5.96E-03 |
| METLIN            | 3,4-Dihydroxyphenylglycol O-sulfate                   | 250.0127 | -2    | 4.50E-02 |
| METLIN            | Thr Thr Glu                                           | 366.1749 | -53   | 3.86E-02 |
| METLIN            | L-Rhamnulose 1-phosphate                              | 304.0556 | 2.2   | 1.90E-03 |
| METLIN            | Suprofen                                              | 306.054  | 2.07  | 1.71E-03 |
| METLIN            | 2-Phenylaminoadenosine                                | 358.1384 | -17   | 2.11E-03 |
| METLIN            | Nicarbazin                                            | 302.0626 | -5.76 | 4.20E-03 |
| METLIN            | 2-Hexaprenyl-6-methoxy-1,4-benzoquinol                | 565.447  | 21    | 3.66E-02 |
| METLIN            | His Ala Ser                                           | 313.138  | 6.99  | 4.62E-02 |
| Molecular Formula | C25 H8 N8 O18                                         | 707.9943 | 67    | 2.98E-02 |

**Table S6. Top significantly altered metabolic pathways from IPA analysis of differential metabolites between Intestine Chip and HCT116-CRC-on-Chip epithelial effluent on D6, Related to Figure 2.**

| Metabolic Pathway                      | p value  | Metabolites                                                                                            |
|----------------------------------------|----------|--------------------------------------------------------------------------------------------------------|
| Alanine Metabolism                     | 3.04E-04 | 2-oxoglutaric acid, L-alanine, L-glutamic acid, pyruvic acid                                           |
| TCA Cycle II (Eukaryotic)              | 2.95E-04 | 2-oxoglutaric acid, citric acid, fumaric acid, L-malic acid, oxalacetic acid, succinic acid            |
| Purine Nucleotides Metabolism          | 8.84E-03 | adenosine, guanine, guanosine, hypoxanthine, inosine, uric acid, xanthine, xanthosine                  |
| Adenosine Nucleotides Metabolism       | 2.15E-05 | adenosine, hypoxanthine, inosine, uric acid, xanthine                                                  |
| Glutamate Metabolism                   | 2.12E-04 | 2-oxoglutaric acid, fumaric acid, L-glutamic acid, oxalacetic acid                                     |
| Superpathway of Methionine Degradation | 8.42E-04 | 2-oxoglutaric acid, adenosine, L-cysteine, L-glutamic acid, L-homocysteine, L-methionine, pyruvic acid |

**Table S7. Top significantly altered metabolic pathways from IPA analysis of differential metabolites between Intestine Chip and HCT116-CRC-on-Chip endothelial effluent on D6, Related to Figure 3.**

| Metabolic Pathway                     | p value  | Metabolites                             |
|---------------------------------------|----------|-----------------------------------------|
| Glycine Betaine Degradation           | 1.06E-04 | L-homocysteine, pyruvic acid, sarcosine |
| Alanine Metabolism                    | 3.42E-04 | 2-oxoglutaric acid, pyruvic acid        |
| H1F1 $\alpha$ signaling               | 8.47E-04 | lactic acid, pyruvic acid               |
| Adenine and Adenosine Salvage pathway | 2.60E-04 | inosine, phosphoribosyl pyrophosphate   |

**Table S8. Analysis of over-expressed cytokines secreted by patient-derived CAFs (Z-score > 0.5), Related to Figure 5 and Figure S7.**

| 000UE | 000US | 000U8 | 000W8 | Cytokines                                                                                                                          | Count |
|-------|-------|-------|-------|------------------------------------------------------------------------------------------------------------------------------------|-------|
| TRUE  | TRUE  | TRUE  | TRUE  |                                                                                                                                    | 0     |
| FALSE | TRUE  | TRUE  | TRUE  |                                                                                                                                    | 0     |
| TRUE  | FALSE | TRUE  | TRUE  |                                                                                                                                    | 0     |
| FALSE | FALSE | TRUE  | TRUE  | IL-17A; LIF; Lipocalin-2                                                                                                           | 3     |
| TRUE  | TRUE  | FALSE | TRUE  |                                                                                                                                    | 0     |
| FALSE | TRUE  | FALSE | TRUE  | ENA-78; GRO-alpha; MCP-1                                                                                                           | 3     |
| TRUE  | FALSE | FALSE | TRUE  | C-Reactive_Protein; FGF-7; FGF_basic; IL-11; Myeloperoxidase; TNF-alpha                                                            | 6     |
| FALSE | FALSE | FALSE | TRUE  | Angiogenin; ICAM-1; IL-4; IL-12_p70; IL-6; IL-8; IL-10; IL-23; IL-24; RANTES; PDGF-AA; PDGF-AB/BB; VEGF; TARC; TFF3; VCAM-1; TIM-3 | 17    |
| TRUE  | TRUE  | TRUE  | FALSE |                                                                                                                                    | 0     |
| FALSE | TRUE  | TRUE  | FALSE | DPPIV; Flt-3_Ligand; IL-18_BPa; MIG                                                                                                | 4     |
| TRUE  | FALSE | TRUE  | FALSE | FGF-19; Thrombospondin-1; Vitamin_D_BP                                                                                             | 3     |

|       |       |       |       |                                                                                                                                                                                                                                                                                                                            |    |
|-------|-------|-------|-------|----------------------------------------------------------------------------------------------------------------------------------------------------------------------------------------------------------------------------------------------------------------------------------------------------------------------------|----|
| FALSE | FALSE | TRUE  | FALSE | Angiopoietin-2; BDNF;<br>Complement_Component_C5/C5a; CD14; CD30;<br>Adiponectin; Cripto-1; EMMPRIN; CD40_ligand; G-<br>CSF; GDF-15; GM-CSF; Fas_Ligand; IL-1beta; IL-<br>1ra; IL-2; IL-3; Growth_Hormone; HGF; IL-13; IL-15;<br>IL-16; IL-19; IL-34; IL-22; Leptin; MIP-3beta; RBP-4;<br>Resistin; Osteopontin; ST2; CD31 | 32 |
| TRUE  | TRUE  | FALSE | FALSE | Cystatin_C; IGFBP-2; IFN-gamma; IL-31; IL-32; MIP-<br>1alpha/MIP-1beta                                                                                                                                                                                                                                                     | 6  |
| FALSE | TRUE  | FALSE | FALSE | BAFF; Angiopoietin-1; EGF; IGFBP-3; IL-1alpha; IL-<br>5; IL-33; IP-10; I-TAC; Kallikrein_3; IL-27;M-CSF;<br>MIP-3alpha; MMP-9; MCP-3; TfR                                                                                                                                                                                  | 16 |
| TRUE  | FALSE | FALSE | FALSE | Apolipoprotein_A-I; Dkk-1; Chitinase_3 like_1;<br>Complement_Factor_D; Endoglin; MIF; PF4; RAGE;<br>Relaxin-2; SDF-1alpha; Pentraxin-3; TGF-alpha;<br>uPAR; SHBG                                                                                                                                                           | 14 |

**Table S9. Analysis of under-expressed cytokines secreted by patient-derived CAFs (Z-score < 0.5), Related to Figure 5 and Figure S7.**

| 000UE | 000US | 000U8 | 000W8 | Cytokines                                                                                                                | Count |
|-------|-------|-------|-------|--------------------------------------------------------------------------------------------------------------------------|-------|
| TRUE  | TRUE  | TRUE  | TRUE  |                                                                                                                          | 0     |
| FALSE | TRUE  | TRUE  | TRUE  |                                                                                                                          | 0     |
| TRUE  | FALSE | TRUE  | TRUE  |                                                                                                                          | 0     |
| FALSE | FALSE | TRUE  | TRUE  | IGFBP-3; IL-31; IL-32; I-TAC; M-CSF; MCP-3; SDF-<br>1alpha                                                               | 7     |
| TRUE  | TRUE  | FALSE | TRUE  |                                                                                                                          | 0     |
| FALSE | TRUE  | FALSE | TRUE  | Apolipoprotein_A-I; Dkk-1; FGF-19; Fas_Ligand; IL-<br>1beta; Osteopontin; Pentraxin-3; Thrombospondin-1;<br>Vitamin_D_BP | 9     |
| TRUE  | FALSE | FALSE | TRUE  | DPPIV; Flt-3_Ligand; G-CSF; GDF-15; IL-18_BPa                                                                            | 5     |
| FALSE | FALSE | FALSE | TRUE  | Angiopoietin-2; BAFF; BDNF;<br>Complement_Component_C5/C5a; EGF; EMMPRIN;<br>CD40_ligand; Chitinase_3-like_1;            | 24    |



|       |       |       |       |                                                                                                                                                                    |    |
|-------|-------|-------|-------|--------------------------------------------------------------------------------------------------------------------------------------------------------------------|----|
|       |       |       |       | Complement_Factor_D; IL-1alpha; IL-1ra; IFN-gamma; IL-16; IL-5; IL-33; Kallikrein_3; MIG; MIP-1alpha/MIP-1beta; MIP-3alpha; MIP-3beta; MMP-9; PF4; RAGE; Relaxin-2 |    |
| TRUE  | TRUE  | TRUE  | FALSE |                                                                                                                                                                    | 0  |
| FALSE | TRUE  | TRUE  | FALSE | Angiogenin; FGF_basic; IL-6; IL-10;<br>Myeloperoxidase; uPAR; SHBG; TFF3                                                                                           | 8  |
| TRUE  | FALSE | TRUE  | FALSE | ENA-78; GRO-alpha; TARC                                                                                                                                            | 3  |
| FALSE | FALSE | TRUE  | FALSE | Cystatin_C; C-Reactive_Protein; Endoglin; IGFBP-2; IL-11; IL-12_p70; IL-27; MIF; MCP-1; Serpin_E1; TfR; TGF-alpha; VCAM-1; TIM-3                                   | 14 |
| TRUE  | TRUE  | FALSE | FALSE | CD14; CD30; Adiponectin; GM-CSF; IL-2; IL-3; Growth_Hormone; ICAM-1; IL-4; IL-15; IL-17A; IL-8; IL-19; Leptin; LIF; Lipocalin-2; Resistin; PDGF-AB/BB; CD31        | 19 |
| FALSE | TRUE  | FALSE | FALSE | Cripto-1; FGF-7; IL-22; IL-23; RANTES; RBP-4;<br>PDGF-AA; TNF-alpha; VEGF; ST2                                                                                     | 10 |
| TRUE  | FALSE | FALSE | FALSE | Angiopoietin-1; HGF; IL-13; IL-34; IP-10; IL-24                                                                                                                    | 6  |

**Table S10. Clinical details of patient samples, Related to Figures 3 and 5 and STAR Methods.**

| Cell Model | Sample ID | Sex    | CRC Stage | Resection Site | Molecular Information of Patient Tumor | Clinical Treatment                  |
|------------|-----------|--------|-----------|----------------|----------------------------------------|-------------------------------------|
| Organoid   | 000US     | Male   | IIb       | Colon          | KDR, KRAS, TP53, SMAD4 mutant          | Adjuvant Xeloda                     |
| CAF        | 000U8     | Female | I         | Colon          | Microsatellite stable (MSS)            | Unknown                             |
| CAF        | 000US     | Male   | IIb       | Colon          | KDR, KRAS, TP53, SMAD4 mutant          | Adjuvant Xeloda                     |
| CAF        | 000UE     | Female | IIIB      | Colon          | MSS                                    | Adjuvant FOLFOX                     |
| CAF        | 000W8     | Male   | IVa       | Liver          | CHEK2 T367M, MSS                       | Adjuvant Xeloda, switched to FOLFOX |

**Table S11. Gene specific primers for qPCR, Related to Figures 4 and 5 and STAR Methods.**

| Gene              | Direction | Sequence 5' → 3'         |
|-------------------|-----------|--------------------------|
| Human GAPDH       | Forward   | TCTGGTAAAGTGGATATTGTTG   |
|                   | Reverse   | GATGGTGATGGGATTTC        |
| Human E-Cadherin  | Forward   | TTTGTACAGATGGGGTCTTGC    |
|                   | Reverse   | CAAGCCCACTTTTCATAGTTCC   |
| Human EpCam       | Forward   | AATGTGTGTGCGTGGA         |
|                   | Reverse   | TTCAAGATTGGTAAAGCCAGT    |
| Human αSMA        | Forward   | CAATGGCTCTGGGCTCTGTAAG   |
|                   | Reverse   | TGTTCTATCGGGTACTTCAGGGTC |
| Human Fibronectin | Forward   | TCCCTCGGAACATCAGAAAC     |
|                   | Reverse   | CAGTGGGAGACCTCGAGAAG     |
| Human Vimentin    | Forward   | GAGAACTTTGCCGTTGAAGC     |
|                   | Reverse   | GCTTCCTGTAGGTGGCAATC     |

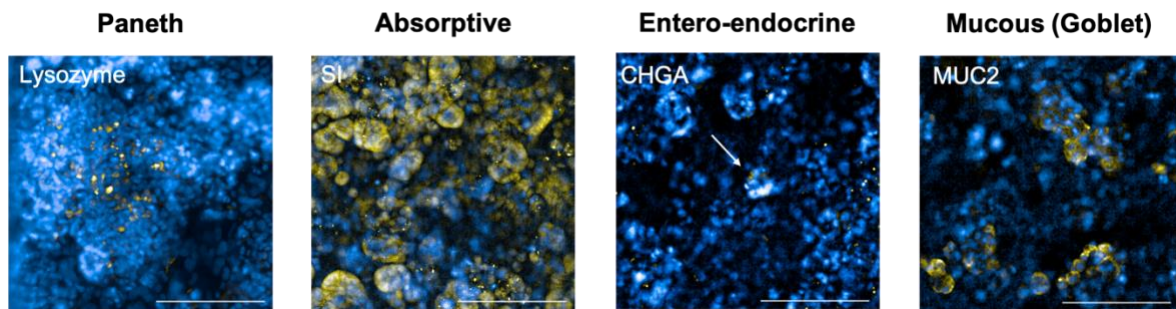

**Figure S1. Caco2 Intestine Chip exhibits different cell types present in the human intestine, Related to Figure 1.** Representative confocal immunofluorescent images of Caco2 C2BBE1 cells on day 6 in the top epithelial channel of the Intestine Chip stained for markers of Paneth cells (Lysozyme), absorptive cells (Sucrose Isomerase; SI), entero-endocrine cells (Chromogranin A; CHGA) and mucus-secreting Goblet cells (Mucin 2; MUC2). Cell nuclei are labeled with DAPI (blue). Scale bars represent 200 μm.

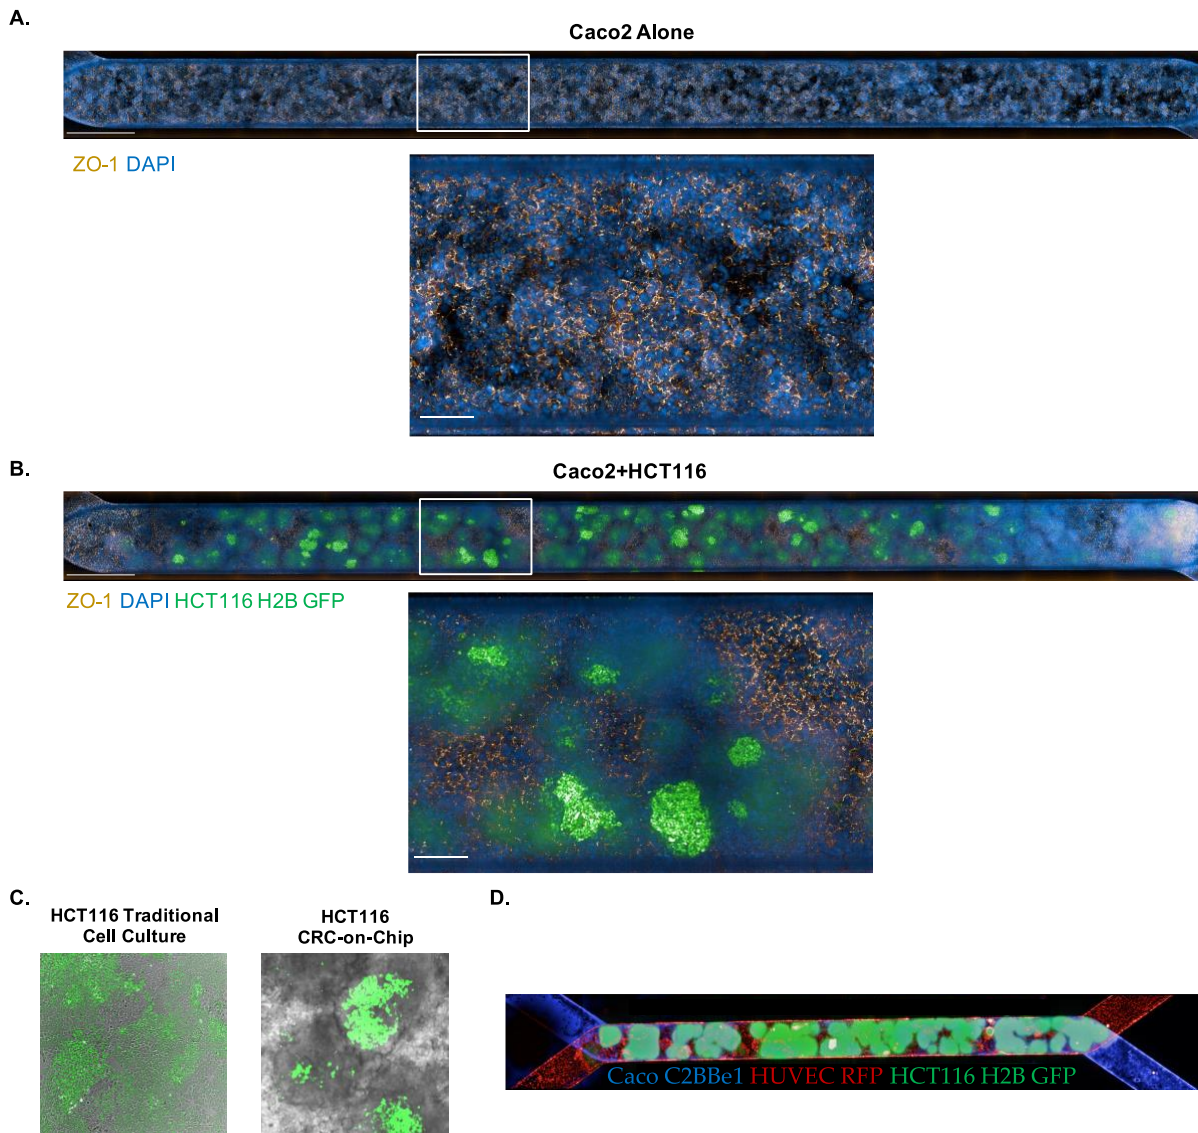

**Figure S2. Tight junction formation and tumor cell morphology in the HCT116-CRC-on-Chip, Related to Figure 1.** **A.** Tiled maximum projection (60  $\mu\text{m}$  Z-height) and zoomed-in (white box) confocal fluorescent images of the epithelial channel of the Caco2 Intestine Chip on day 6 stained for tight junction protein ZO-1 (gold). Cell nuclei are labeled with DAPI (blue). Scale bar represents 1 mm on the tiled image and 200  $\mu\text{m}$  on the zoomed-in image. **B.** Tiled maximum projection (60  $\mu\text{m}$  Z-height) and zoomed-in (white box) confocal fluorescent images of the epithelial channel of the HCT116-CRC-on-Chip on day 6 stained for tight junction protein ZO-1 (gold). HCT116 are labeled with H2B GFP (green) and cell nuclei are labeled with DAPI (blue). Scale bar represents 1 mm on the tiled image and 200  $\mu\text{m}$  on the zoomed-in image. **C.** HCT116 H2B-GFP morphology was compared between traditional 2D cell culture and on-chip. **D.** Tiled confocal fluorescent image of the entire CRC Chip. HCT116 tumor cells are H2B GFP labeled, and HUVEC cells are RFP labeled. The nuclei of the top epithelial channel were stained with DAPI.

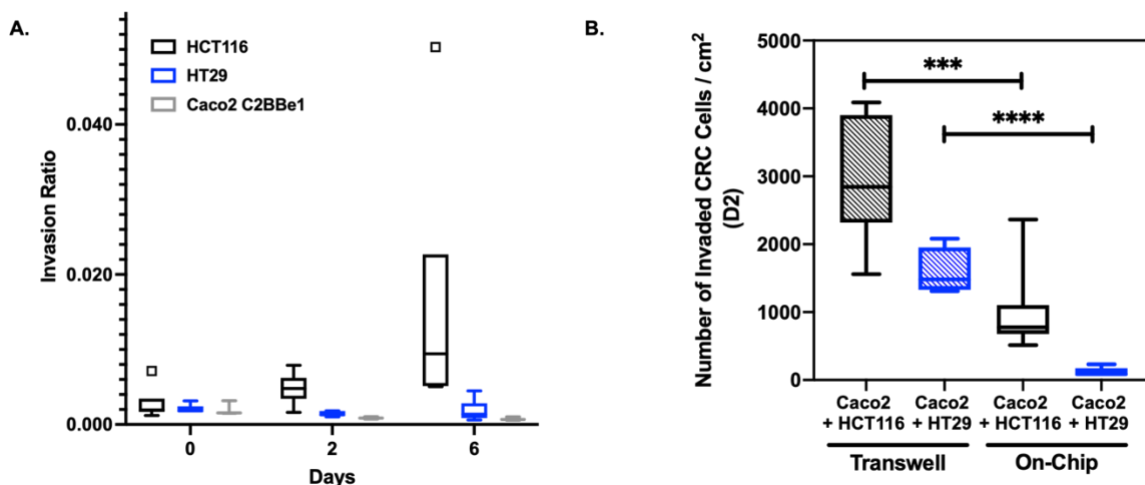

**Figure S3. Validation of CRC-on-chip intravasation assay, Related to Figure 3. (A)** Tumor cell (HCT116 or HT29) invasion was monitored over time by imaging the same chip regions at various timepoints, days 0, 2, 6, as described in Figure 3. Caco2 C2BBe1 cells were stained with Cell Tracker Green (CTG) and invasion of the Caco2 cells was measured in the Intestine Chip (N=3 Chips) on days 0, 2, and 6 as described in Figure 3. Raw invasion ratios were plotted as boxplots with Tukey's rule indicating an outlier (black box). In order to account for outliers, all data was normalized back to D0 invasion ratios as shown in Figure 3D. **(B)** Tumor cell invasion on-chip (day 2) was compared to traditional transwell invasion assays. HUVEC cells were seeded onto the bottom of the transwell membrane and tumor cells were seeded on the top of an ECM coated fluoroblok transwell and the GFP+ cells were counted 48 hours later on the bottom of the membrane. (N=6 Chips). Data are represented as boxplots and analyzed using an unpaired t-test; \*\*\*p<0.001; \*\*\*\*p<0.0001.

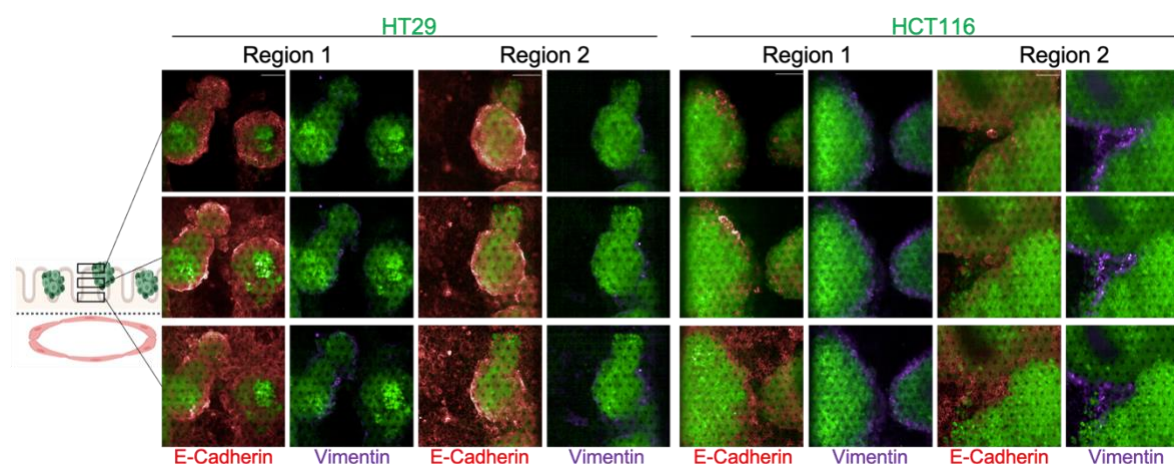

**Figure S4. HT29 and HCT116 cells show different expression of epithelial and mesenchymal markers, Related to Figure 4.** Representative images of HT29 and HCT116 clusters in top channel stained with E-cadherin and vimentin. Strong vimentin positive staining is observed on the periphery of HCT116 cell clusters compared to HT29 cells on day 10. Scale bars represent 100  $\mu$ m.

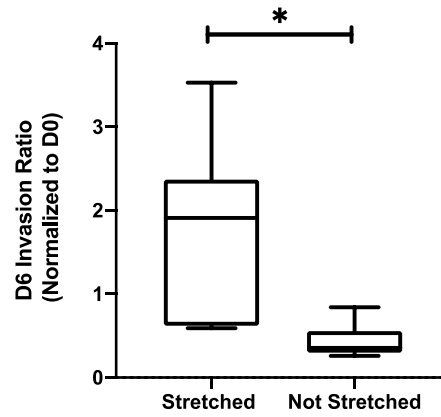

**Figure S5. Peristalsis increases invasion in the CRC-on-Chips with HT29 tumor cells, Related to Figure 5.** The invasion of HT29 H2B GFP cells was measured in the CRC-on-Chip (N=6 Chips) on day 6 of the experiment. Six regions of the chip were imaged via confocal microscopy and input into 3D reconstruction software for GFP+ cell quantification. An invasion ratio was calculated based on the number of GFP+ cells in the bottom channel compared to the top channel and normalized by the day 0 counts. Data are represented as boxplots and analyzed with an unpaired t-test; \* $p < 0.05$ .

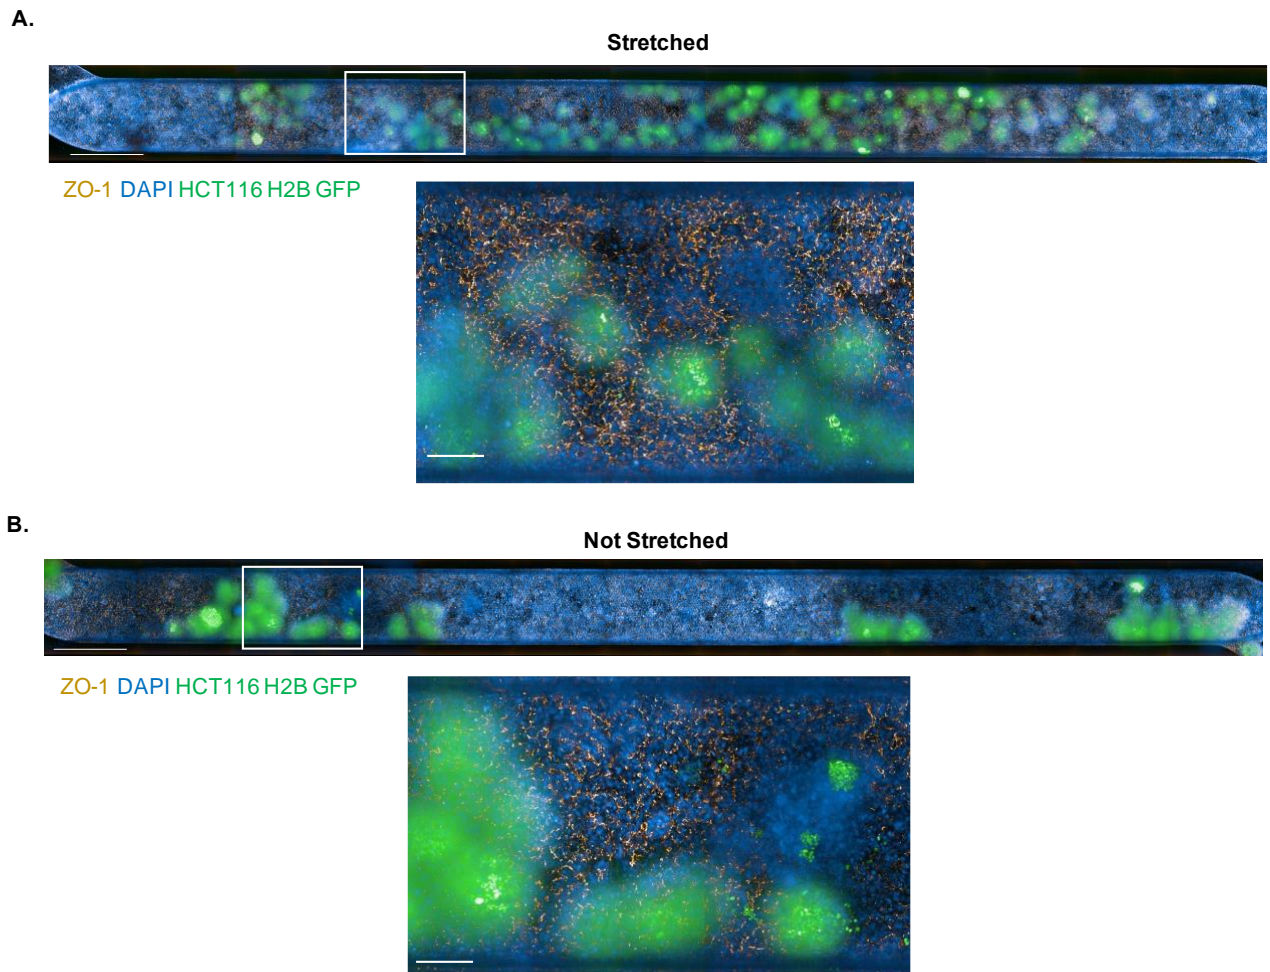

**Figure S6. Peristalsis does not noticeably change tight junction formation in HCT116-CRC-on-Chips, Related to Figure 5.** **A.** Tiled maximum projection (60  $\mu\text{m}$  Z-height) and zoomed-in (white box) confocal fluorescent images of the epithelial channel of the HCT116-CRC-on-Chip on day 6 in the presence of cyclic peristalsis-like motions. Chips were stained for tight junction protein ZO-1 (gold). HCT116 tumor cells are labeled with H2B GFP (green) and cell nuclei are labeled with DAPI (blue). Scale bar represents 1 mm on the tiled image and 200  $\mu\text{m}$  on the zoomed-in image. **B.** Tiled maximum projection (60  $\mu\text{m}$  Z-height) and zoomed-in (white box) confocal fluorescent images of the epithelial channel of the HCT116-CRC-on-Chip on day 6 in the absence of cyclic peristalsis-like motions. Chips were stained for tight junction protein ZO-1 (gold). Images are not representative of HCT116 cluster number or distribution throughout the channel, as clusters may be lost during the fixation and immunofluorescence process, particularly in the not stretched conditions. HCT116 tumor cells are labeled with H2B GFP (green) and cell nuclei are labeled with DAPI (blue). Scale bar represents 1 mm on the tiled image and 200  $\mu\text{m}$  on the zoomed-in image.

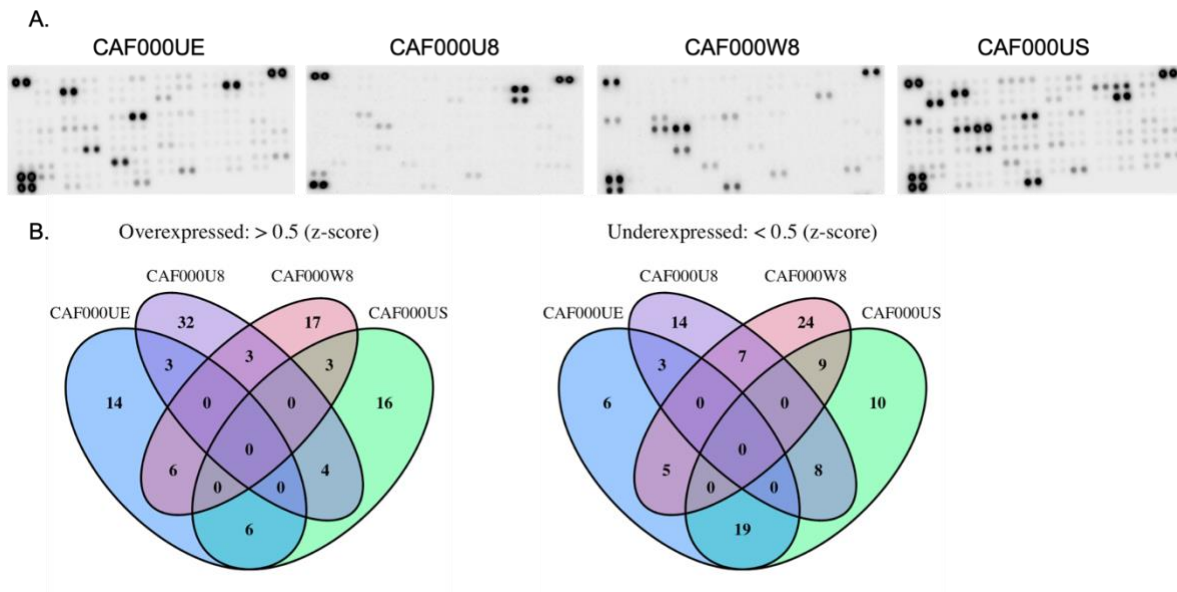

**Figure S7. Patient-derived CAFs show heterogeneous cytokine profiles, Related to Figure 5 and Tables S8 and S9. (A)** Raw images of cytokine array blots performed on conditioned media collected from patient-derived CAFs. **(B)** Cytokine and growth factor expression was evaluated via cytokine arrays. Z-scores were determined and the overlap of upregulated and downregulated cytokines (> or < 0.5 fold) across CAF lines is shown. Refer to Tables S8 and S9 for cytokine details. N=2 lots of CM for each CAF.

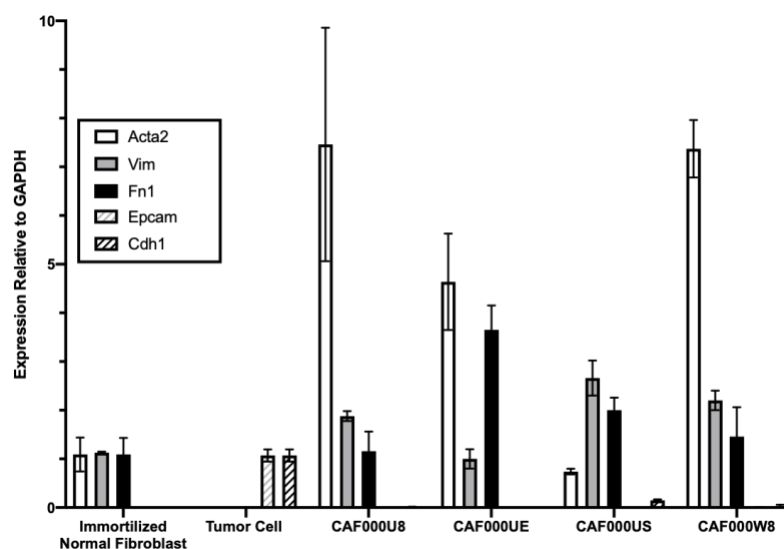

**Figure S8. Validation of CAFs isolated from patient tissues, Related to Figure 5 and STAR Methods.** qPCR analysis of CAF-associated markers: alpha smooth muscle actin (*Acta2*), fibronectin (*Fn1*), and vimentin (*Vim*) and epithelial markers: EpCam (*Epcam*) and E-Cadherin (*Cdh1*) was performed on primary CAF cells isolated from patients 000UE, 000U8, 000US, and 000W8, CRC tumor cells (HCT116), and an immortalized normal fibroblast cell line (CCD18Co) (N=3 replicates). Data are represented as mean  $\pm$  SEM.
